# Supplementary material
Source: PubMed Central journal article supplement (PMC3428886)

“ONLINE SUPPORTING MATERIAL”

FIGURE 1

Figure shows the change in plasma holo-TC concentration during oral cyanocobalamin absorption test. Baseline and post dose concentrations are joined by a line for each individual. Panel A shows the results for 10 µg group and panel B for 2 µg group. Fold-rise is shown for each group of participants.

“ONLINE SUPPORTING MATERIAL”

**A**

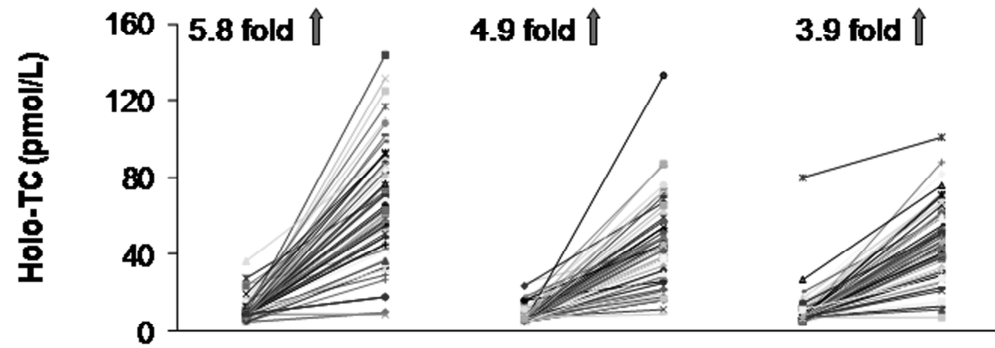

**B**

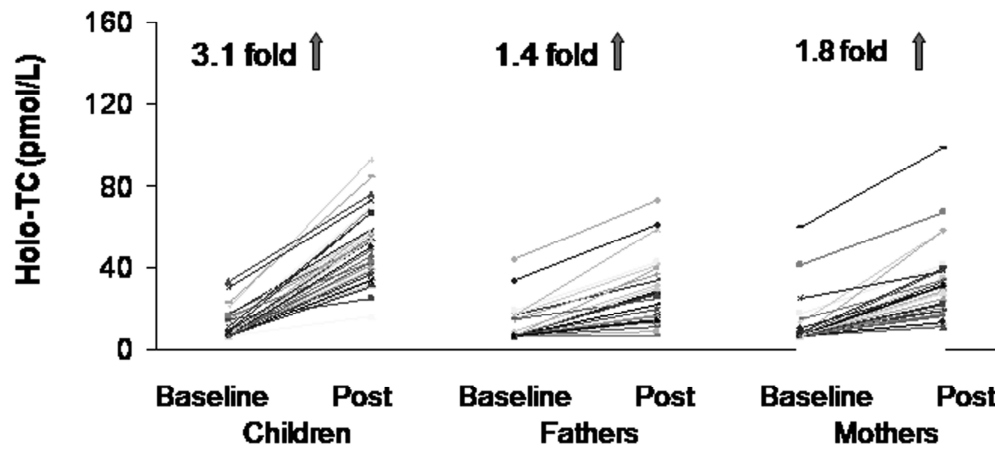

Supplement: NIHMS37958-supplement-01.pdf [file NIHMS37958-supplement-01.pdf]
